# Supplementary material for: Competitive adsorption of a pool of pharmaceuticals onto a raw clay mineral
Source: Royal Society of Chemistry journal article supplement (doi:10.1039/c6ra10655b), 2016-01-01
Supplement: c6ra10655b1.pdf [file c6ra10655b1.pdf]

## Competitive adsorption mechanisms in a pool of pharmaceuticals onto a raw clay mineral

*Thomas Thiebault\*<sup>a</sup>, Mohammed Boussafir<sup>a</sup>, Lydie Le Forestier<sup>a</sup>, Claude Le Milbeau<sup>a</sup>,  
Lucie Monnin<sup>a</sup>, Régis Guégan<sup>a</sup>*

<sup>a</sup> ISTO, UMR 7327, Univ Orléans, CNRS, BRGM, 1A Rue de la Férollerie, 45071 Orléans Cedex 2, France

<sup>b</sup> CEREGE, UMR 7330, CNRS, Univ Aix-Marseille, 13545 Aix-en-Provence Cedex 4, France

### Supplementary Material

Table S1 : Analytical performance of the PhACs pool with RT, the retention time, m/z ratio, the chosen fragments for the quantification and confirmation in brackets, Recovery, the recovery rate of the experimental process, L.O.Q., the limit of quantification and  $r^2$  the correlation coefficient of the calibration curves for the quantification of each PhAC.

| Compound             | RT<br>min | m/z ratio | Recovery<br>%   | L.O.D.<br>$\mu\text{g}\cdot\text{L}^{-1}$ | $r^2$ |
|----------------------|-----------|-----------|-----------------|-------------------------------------------|-------|
| Acetaminophen (ACM)  | 41.71     | 322 (248) | $85.0 \pm 0.49$ | 0.01                                      | 0.980 |
| Carbamazepine (CBZ)  | 53.56     | 193 (237) | $73.3 \pm 0.80$ | 0.08                                      | 0.997 |
| Diclofenac (DIC)     | 54.61     | 352 (214) | $85.0 \pm 0.82$ | 0.03                                      | 0.999 |
| Doxepin (DOX)        | 46.98     | 58 (313)  | $116 \pm 2.51$  | 0.11                                      | 0.995 |
| Gemfibrozil (GEM)    | 44.41     | 243 (185) | $70.8 \pm 1.96$ | 0.06                                      | 0.999 |
| Ibuprofen (IBU)      | 33.78     | 263 (303) | $78.7 \pm 1.09$ | 0.04                                      | 0.980 |
| Ketoprofen (KET)     | 51.71     | 311 (295) | $65.4 \pm 1.02$ | 0.04                                      | 0.999 |
| Metoprolol (MET)     | 47.86     | 223 (324) | $70.8 \pm 1.98$ | 0.08                                      | 0.994 |
| Naproxen (NAP)       | 48.18     | 287 (185) | $85.1 \pm 2.09$ | 0.06                                      | 0.998 |
| Salicylic Acid (SCA) | 37.36     | 309 (195) | $82.5 \pm 0.96$ | 0.04                                      | 0.979 |
| Tramadol (TRA)       | 38.06     | 58 (263)  | $98.7 \pm 2.82$ | 0.09                                      | 0.994 |

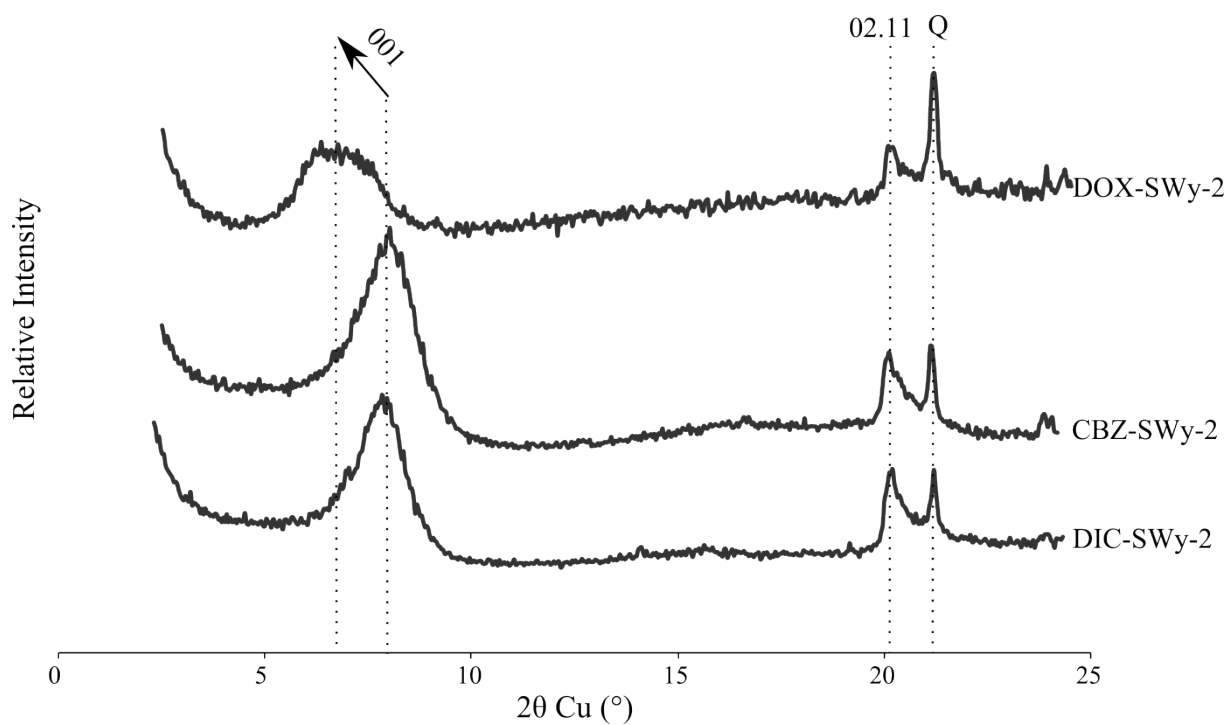

Figure S2 : X-ray diffractograms of clay mineral samples after interactions with single component solution of Doxepin (DOX-SWy-2), Diclofenac (DIC-SWy-2) and Carbamazepine (CBZ-SWy-2). The starting concentration was 1 mg L<sup>-1</sup> in a solid/liquid ratio of 50 mg of clays for 50 mL of solution. Q corresponds to quartz impurities.
